# Supplementary material for: Epitaxial crystallization of precisely bromine-substituted polyethylene induced by carbon nanotubes and graphene
Source: Royal Society of Chemistry journal article supplement (doi:10.1039/c7ra00958e), 2017-01-01
Supplement: c7ra00958e1.pdf [file c7ra00958e1.pdf]

## Supporting information

### **Epitaxial crystallization of precisely bromine-substituted polyethylene induced by carbon nanotube and graphene**

Weijun Miao <sup>1</sup>, Bingjie Wang <sup>2</sup>, Yiguo Li <sup>3</sup>, Wenge Zheng <sup>4</sup>, Hongbing Chen <sup>1</sup>, Li Zhang <sup>1\*</sup>, Zongbao Wang <sup>1\*</sup>.

<sup>1</sup>Ningbo Key Laboratory of Specialty Polymers, Faculty of Materials Science and Chemical Engineering, Ningbo University, Ningbo 315211, China

<sup>2</sup>State Key Laboratory of Molecular Engineering of Polymers, Fudan University, Shanghai 200428, China

<sup>3</sup>Collaborative Innovation Center for Petrochemical New Materials, School of Chemistry and Chemical Engineering, Anqing Normal University, Anqing 246011, China

<sup>4</sup>Ningbo Key Laboratory of Polymer Materials, Ningbo Institute of Material Technology and Engineering, Chinese Academy of Sciences, Ningbo 315201, China

\* Corresponding authors. Department of Polymer Science and Engineering, Faculty of Materials Science and Chemical Engineering, Ningbo University, Ningbo 315211, China.

E-mail: zhangli2@nbu.edu.cn (L. Zhang); wangzongbao@nbu.edu.cn (Z. Wang)

Figure S1 shows the  $^1\text{H}$  NMR spectra for the ADMET polymer PE21Br and its precursors. Monomer is featured with the two signals of terminal alkenes appearing at 5.0 and 5.8 ppm (Figure S1C). The corresponding polymer (Figure S1B) exhibits signals of internal alkenes at 5.4 ppm, meanwhile, signals of the terminal alkene is invisible in the  $^1\text{H}$  NMR spectrum, indicative of high molecular weight of unsaturated polymer. After exhaustive hydrogenation of the unsaturated polymer, PE21Br (Figure S1A) is characterized by complete disappearance of the signals of internal alkenes at 5.4 ppm. The  $^1\text{H}$  NMR for PE21Br shows a methine proton (e) at 4.1 ppm, and methylene protons (d) at 1.9 ppm and (f) at 1.3-1.6 ppm, a perfectly sequenced polymer, corresponding to polyethylene with substituent Br on every 21st backbone carbon.

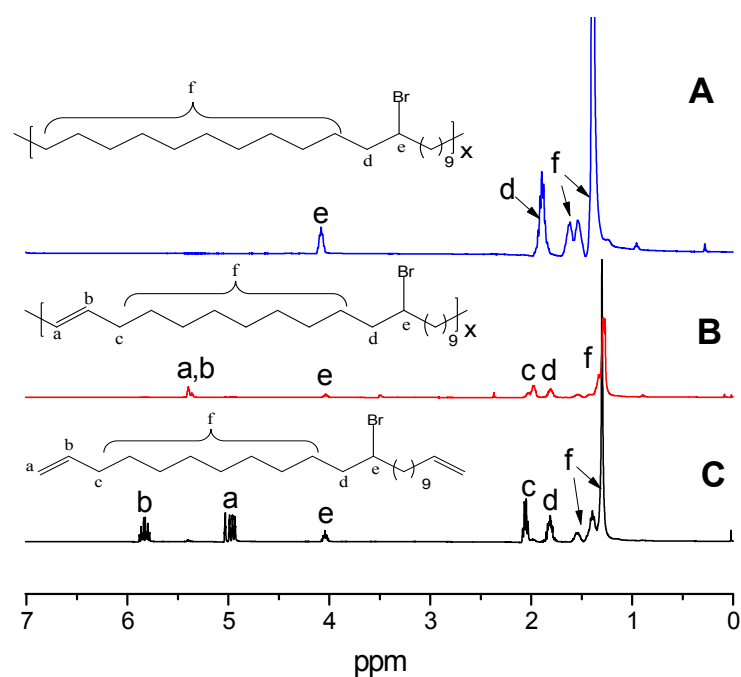

**FIGURE S1.**  $^1\text{H}$  NMR for (A) PE21Br, (B) Unsaturated polymer and (C) Monomer.
